# Supplementary material for: Identification of P2RY13 as an immune-related prognostic biomarker in lung adenocarcinoma: A public database-based retrospective study
Source: PeerJ journal article supplement (doi:10.7717/peerj.11319), 2021-05-05

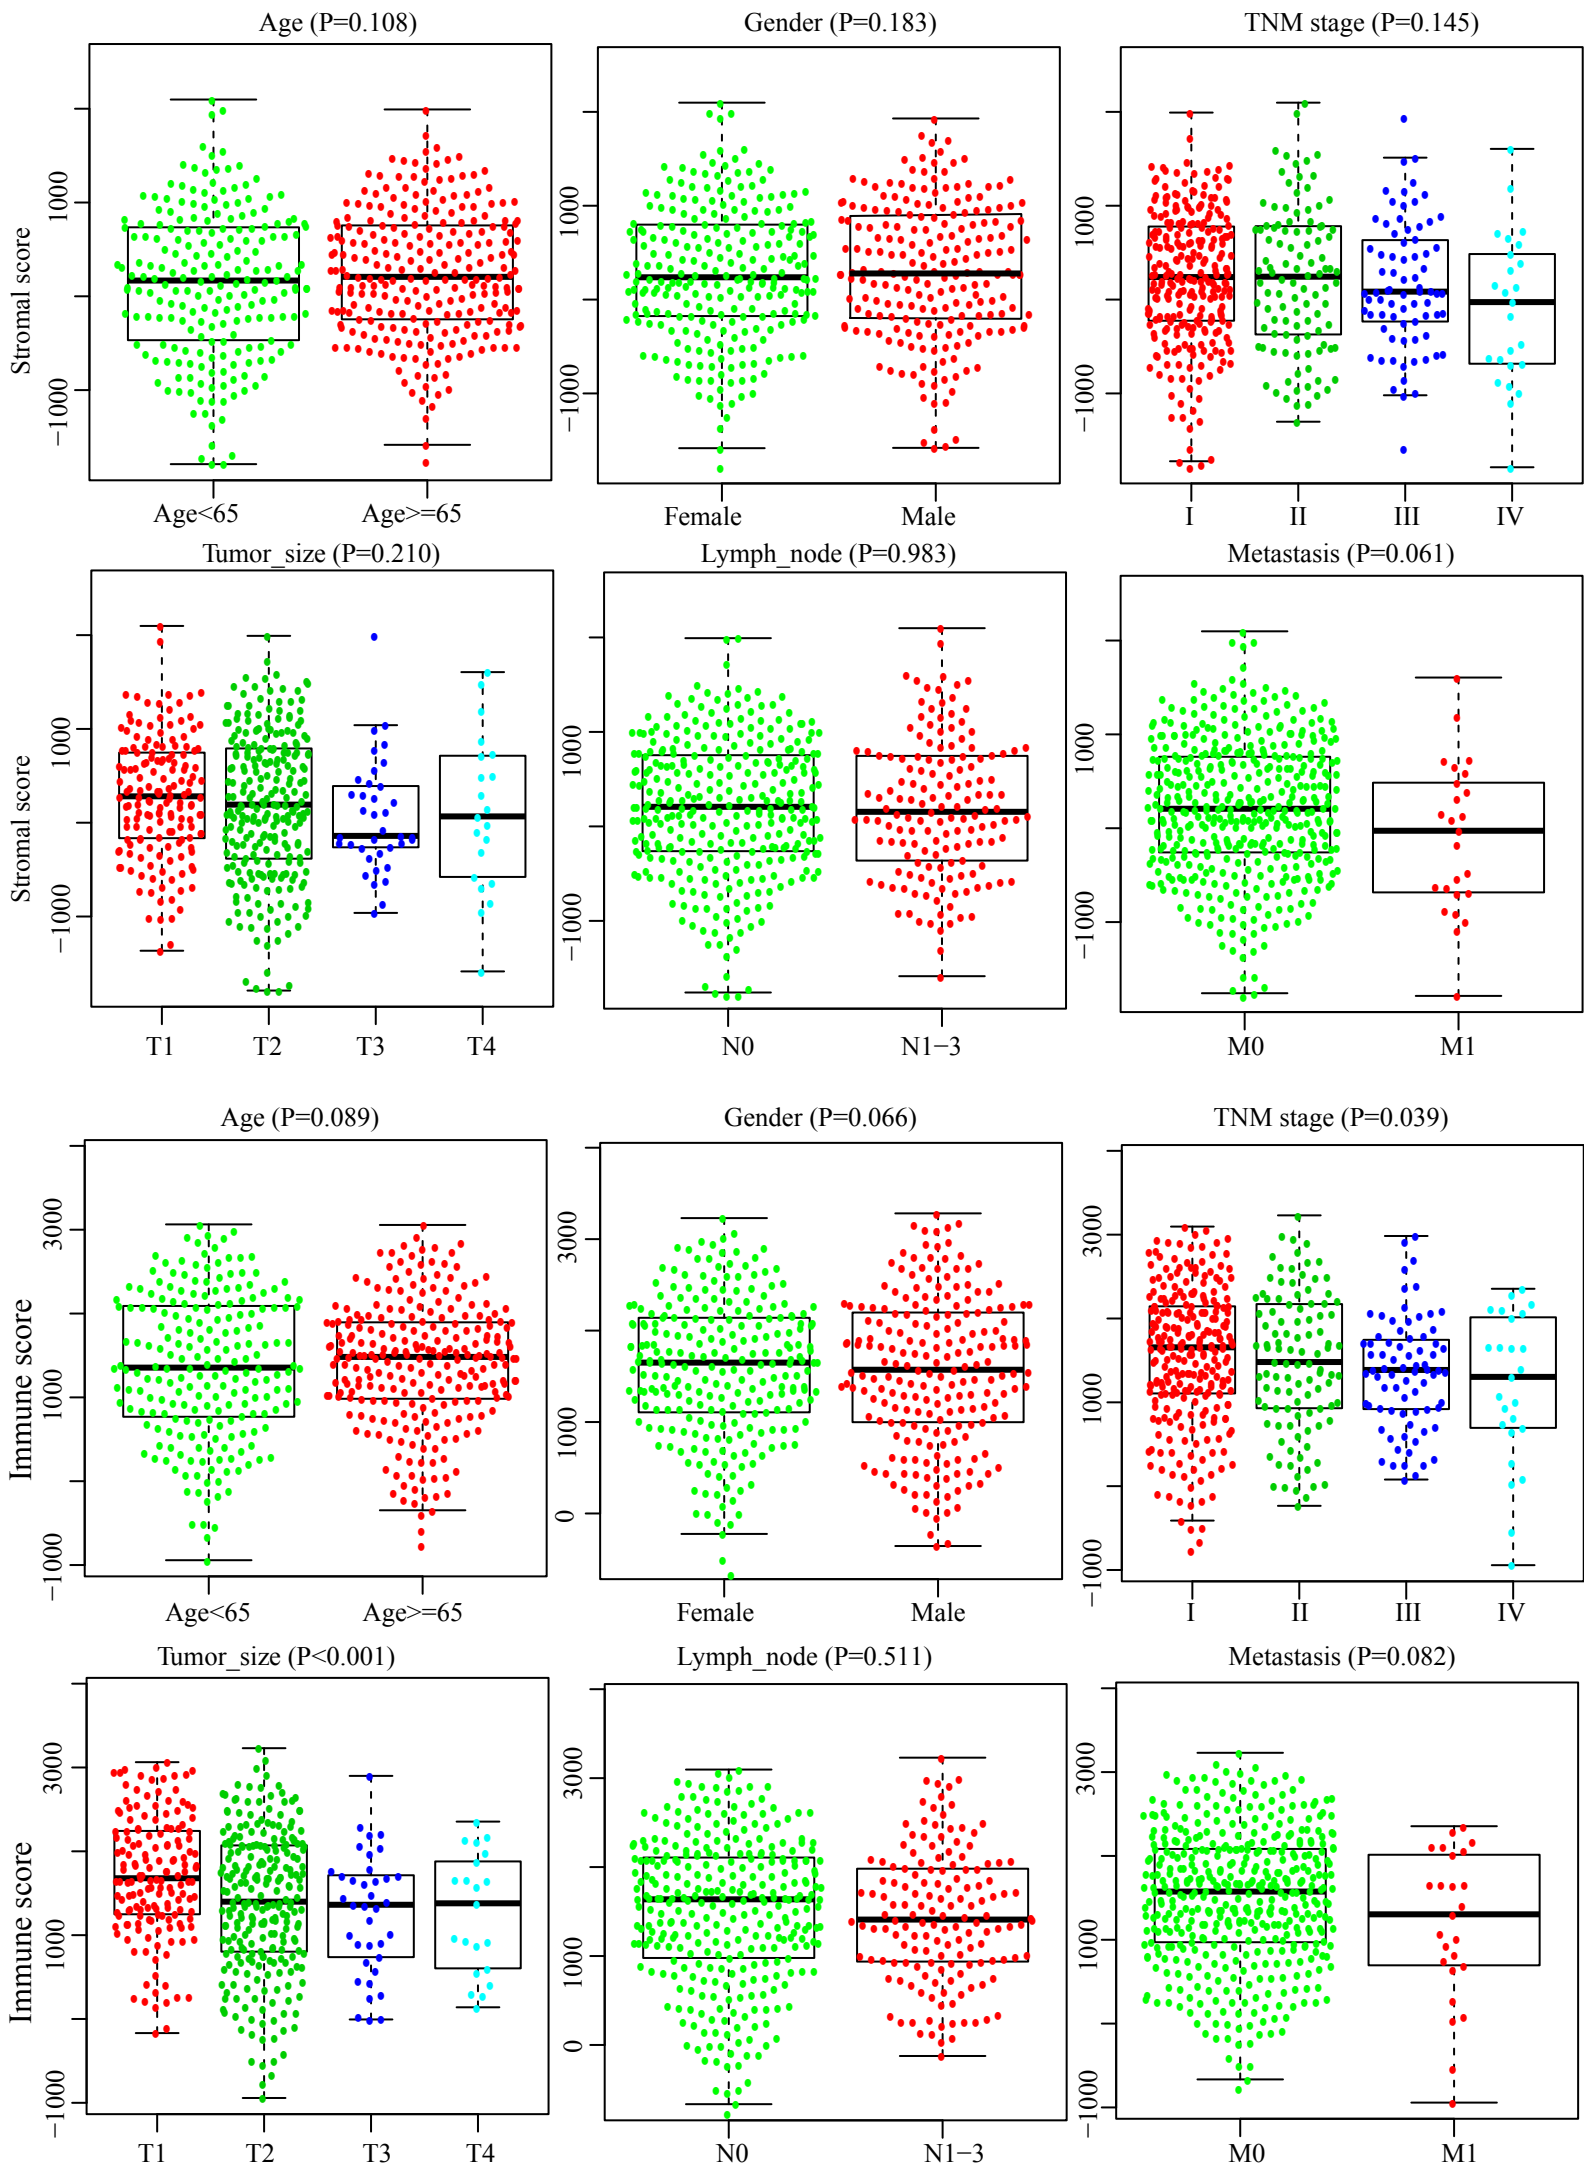

Supplement: Figure_S1.pdf [file Figure_S1.pdf]
