# Supplementary material for: Identification of P2RY13 as an immune-related prognostic biomarker in lung adenocarcinoma: A public database-based retrospective study
Source: PeerJ journal article supplement (doi:10.7717/peerj.11319), 2021-05-05

Age (P=0.644)

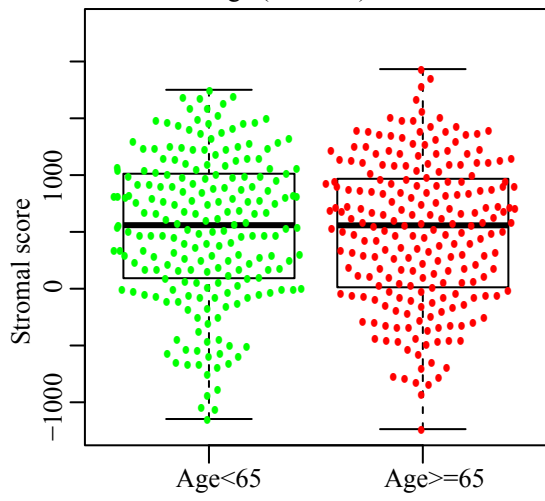

Gender (P=0.754)

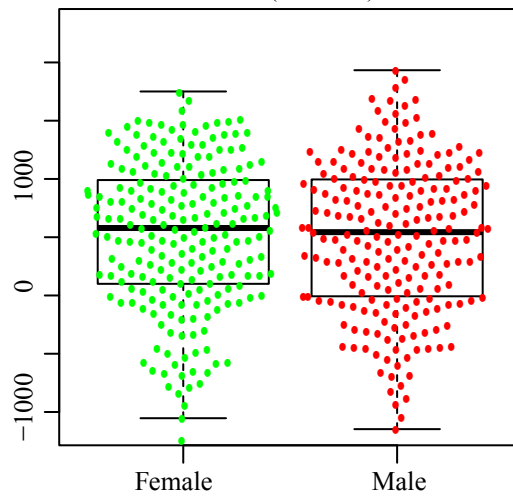

TNM stage (P=0.428)

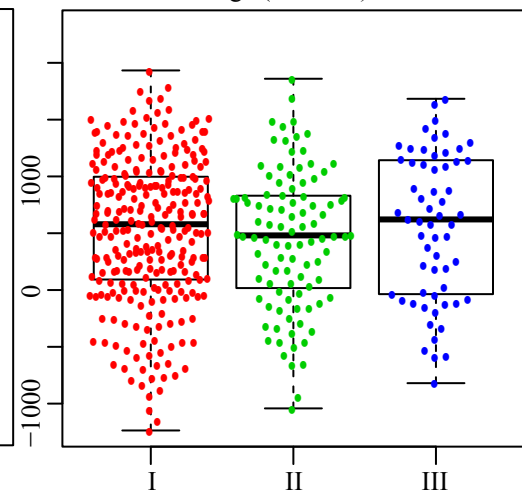

Tumor\_size (P=0.014)

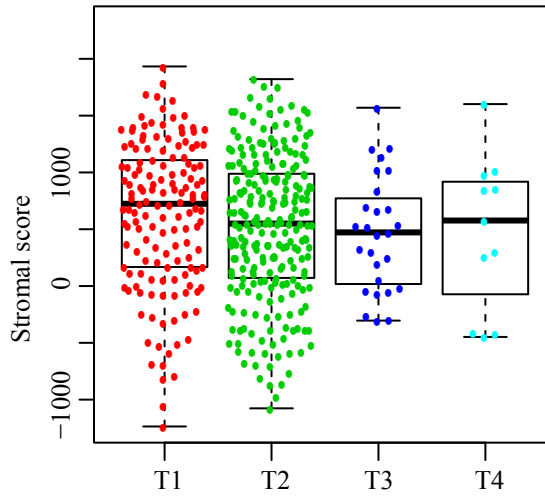

Lymph\_node (P=0.690)

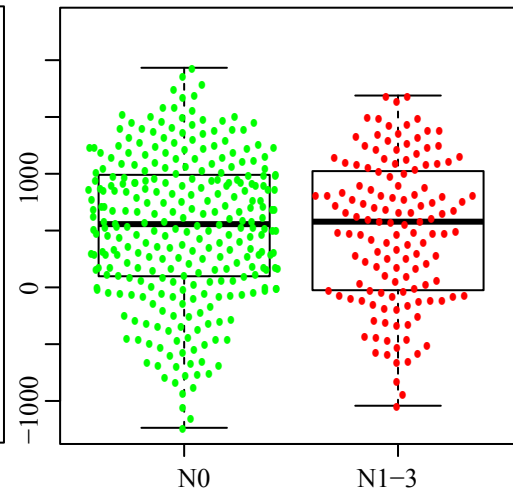

Age (P=0.688)

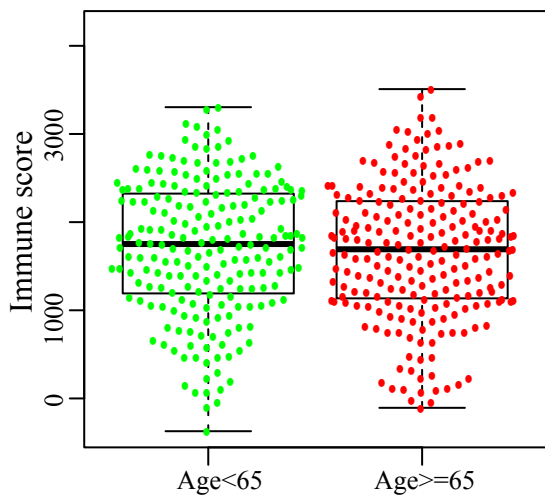

Gender (P=0.103)

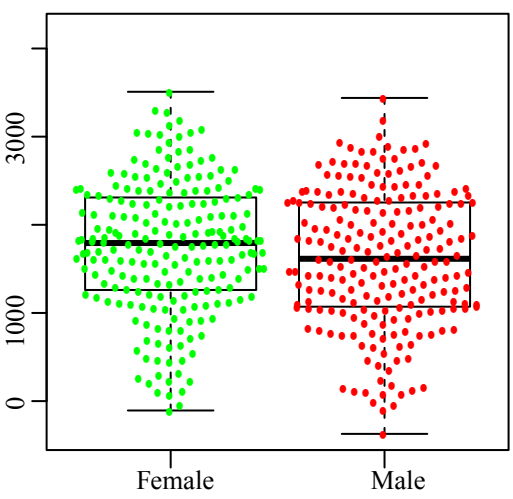

TNM stage (P=0.046)

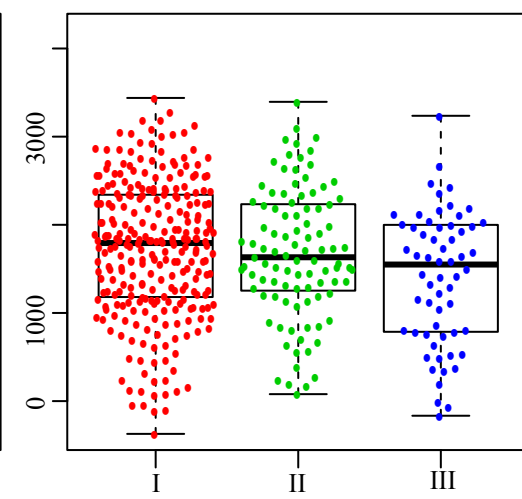

Tumor\_size (P=0.045)

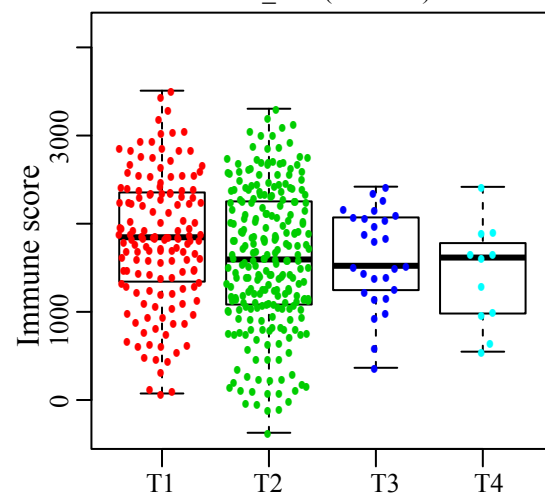

Lymph\_node (P=0.089)

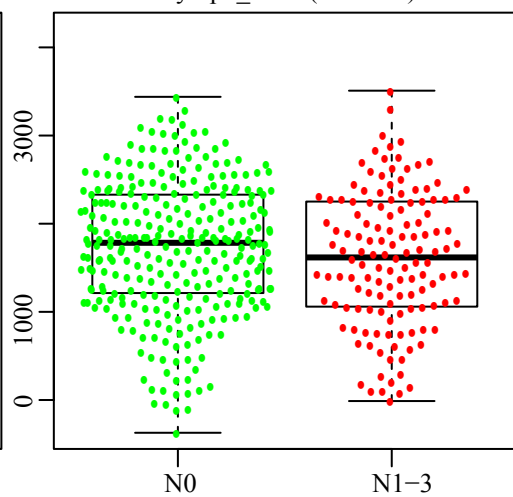

Supplement: Figure_S2.pdf [file Figure_S2.pdf]
