# Supplementary material for: Identification of P2RY13 as an immune-related prognostic biomarker in lung adenocarcinoma: A public database-based retrospective study
Source: PubMed Central journal article supplement (PMC8106393; doi:10.7717/peerj.11319), 2021-05-05

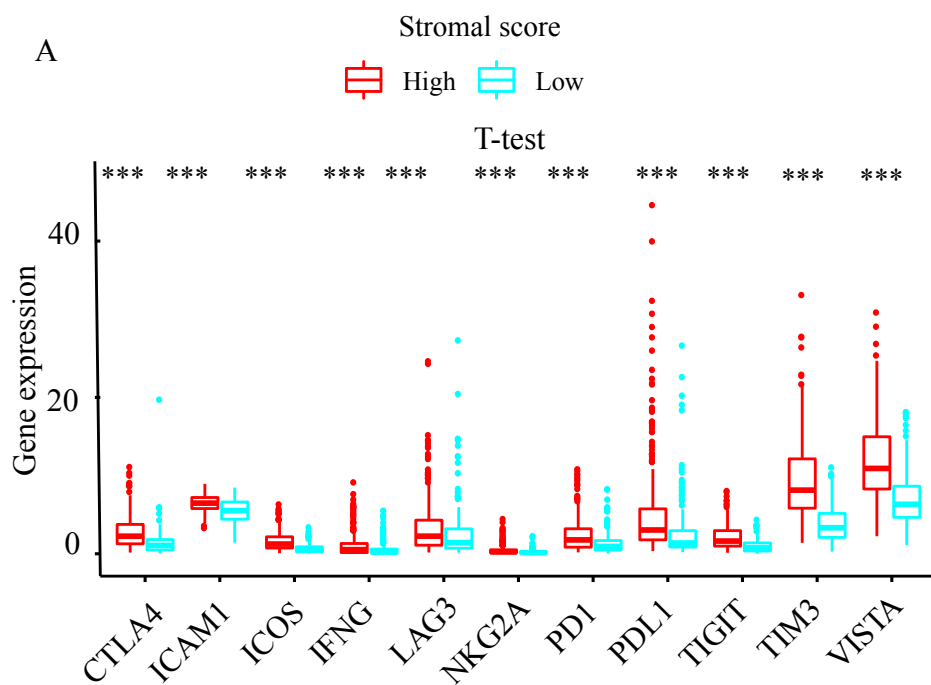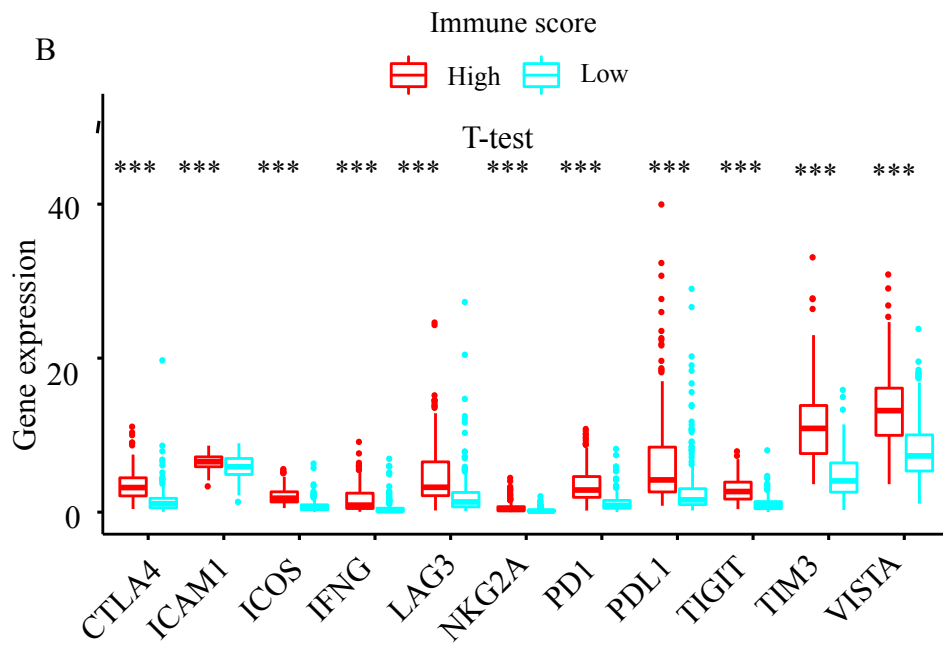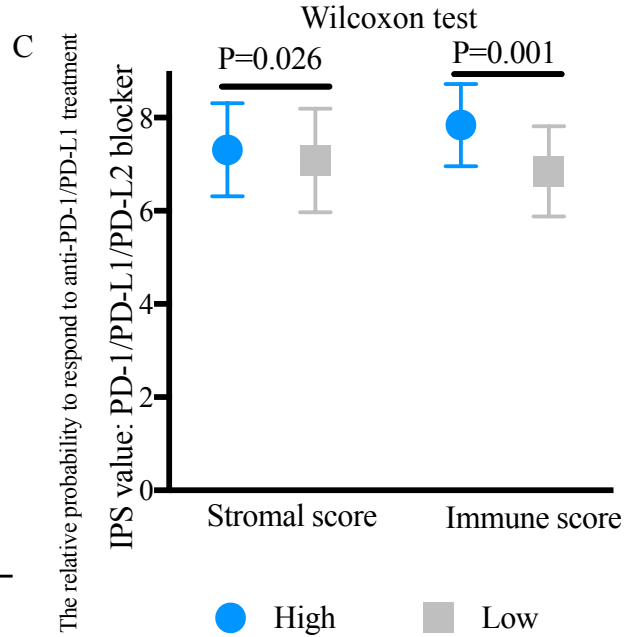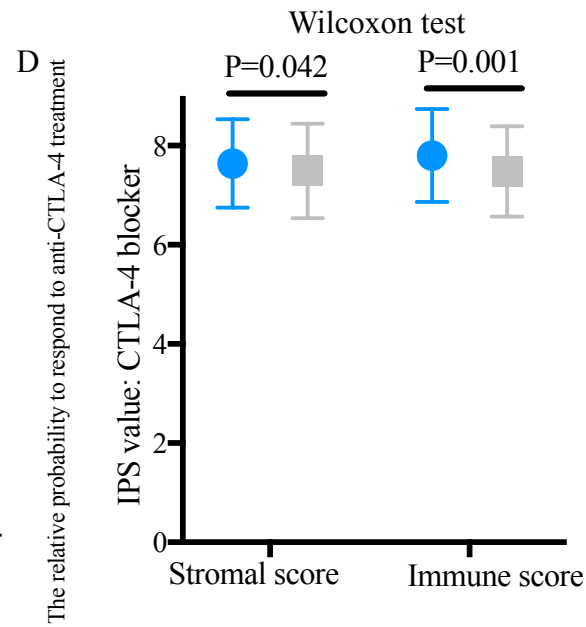

Supplement: peerj-09-11319-s005.pdf [file peerj-09-11319-s005.pdf]
